# Supplementary material
Source: MDPI journal article supplement (https://www.mdpi.com/2072-4292/16/1/45)
Supplement: s1 [file s1]

## Supplementary materials

### LIST OF TABLES

**Table S1** Lists of cities of BTH, CYRD and PRD. (UA refers to urban agglomeration).

**Table S2** Area and occupancy rate of EQI at various levels in core and expansion areas in 2001 and 2020 in three urban agglomerations.

**Table S3** Result of intensity of urban expansion, EQI changes and USI of all cities in three urban agglomerations. (UEI, EQICI and USI mean the urban expansion intensity, EQI change intensity and urban synergistic index, respectively).

**Table S4** Total area and land occupation rate of  $\Delta$ EQI at various levels of urban agglomerations.

**Table S5** Results of collinearity diagnosis of single urban agglomeration.

**Table S6** Global Moran' I measurement results of EQI in three urban agglomerations.

**Table S1.** Lists of cities of BTH, CYRD and PRD. (UA refers to urban agglomeration).

| UA         | Province | City         | UA          | Province | City      | UA         | Province  | City      |
|------------|----------|--------------|-------------|----------|-----------|------------|-----------|-----------|
| <b>BTH</b> | Beijing  | Beijing      | <b>CYRD</b> | Shanghai | Shanghai  | <b>PRD</b> | Guangdong | Dongguan  |
|            | Tianjin  | Tianjin      |             | Anhui    | Anqing    |            |           | Foshan    |
|            |          | Chengde      |             |          | Chizhou   |            |           | Guangzhou |
|            |          | Baoding      |             |          | Chuzhou   |            |           | Huizhou   |
|            |          | Zhangjiakou  |             |          | Hefei     |            |           | Jiangmen  |
|            |          | Qinhuangdao  |             |          | Maanshan  |            |           | Shenzhen  |
|            |          | Tangshan     |             |          | Tongling  |            |           | Zhaoqing  |
|            | Hebei    | Langfang     |             |          | Wuhu      |            |           | Zhongshan |
|            |          | Shijiazhuang |             |          | Xuancheng |            |           | Zhuhai    |
|            |          | Cangzhou     |             | Jiangsu  | Changzhou |            |           |           |
|            |          | Hengshui     |             |          | Nanjing   |            |           |           |
|            |          | Xingtai      |             |          | Nantong   |            |           |           |
|            |          | Handan       |             |          | Suzhou    |            |           |           |
|            |          |              |             |          | Taizhou   |            |           |           |
|            |          |              |             |          | Wuxi      |            |           |           |
|            |          |              |             |          | Yancheng  |            |           |           |
|            |          |              |             |          | Yangzhou  |            |           |           |
|            |          |              |             |          | Zhenjiang |            |           |           |
|            |          |              |             | Zhejiang | Hangzhou  |            |           |           |
|            |          |              |             |          | Huzhou    |            |           |           |
|            |          |              |             |          | Jiaxing   |            |           |           |
|            |          |              |             |          | Jinhua    |            |           |           |
|            |          |              |             |          | Ningbo    |            |           |           |
|            |          |              |             |          | Shaoxing  |            |           |           |
|            |          |              |             |          | Taizhou   |            |           |           |
|            |          |              |             |          | Wenzhou   |            |           |           |
|            |          |              |             |          | Zhoushan  |            |           |           |

**Table S2.** Area and occupancy rate of EQI at various levels in core and expansion areas in 2001 and 2020 in three urban agglomerations.

| BTH                                          |                |            |                |            |                     |            |                     |            |
|----------------------------------------------|----------------|------------|----------------|------------|---------------------|------------|---------------------|------------|
|                                              | BTH_2001_Core  |            | BTH_2020_Core  |            | BTH_2001_Expansion  |            | BTH_2020_Expansion  |            |
| EQI level                                    | Area           | Percentage | Area           | Percentage | Area                | Percentage | Area                | Percentage |
| Excellent                                    | 0              | 0          | 0              | 0          | 4                   | 0.09       | 0                   | 0          |
| Good                                         | 20             | 0.61       | 2              | 0.06       | 738                 | 16.96      | 6                   | 0.14       |
| Moderate                                     | 730            | 22.33      | 61             | 1.87       | 2335                | 53.67      | 543                 | 12.48      |
| Poor                                         | 2419           | 74.0       | 2532           | 77.45      | 1235                | 28.38      | 3509                | 80.65      |
| Bad                                          | 100            | 3.06       | 674            | 20.62      | 39                  | 0.90       | 293                 | 6.73       |
| CYRD                                         |                |            |                |            |                     |            |                     |            |
|                                              | CYRD_2001_Core |            | CYRD_2020_Core |            | CYRD_2001_Expansion |            | CYRD_2020_Expansion |            |
| EQI level                                    | Area           | Percentage | Area           | Percentage | Area                | Percentage | Area                | Percentage |
| Excellent                                    | 1              | 0.02       | 1              | 0.02       | 43                  | 0.36       | 4                   | 0.03       |
| Good                                         | 209            | 4.39       | 16             | 0.34       | 6455                | 53.67      | 124                 | 1.03       |
| Moderate                                     | 1814           | 38.14      | 472            | 9.92       | 4343                | 36.11      | 3914                | 32.55      |
| Poor                                         | 2687           | 56.50      | 4193           | 88.16      | 1076                | 8.95       | 7872                | 65.45      |
| Bad                                          | 45             | 0.95       | 74             | 1.56       | 110                 | 0.91       | 113                 | 0.94       |
| PRD                                          |                |            |                |            |                     |            |                     |            |
|                                              | PRD_2001_Core  |            | PRD_2020_Core  |            | PRD_2001_Expansion  |            | PRD_2020_Expansion  |            |
| EQI level                                    | Area           | Percentage | Area           | Percentage | Area                | Percentage | Area                | Percentage |
| Excellent                                    | 5              | 0.10       | 6              | 0.12       | 28                  | 1.05       | 5                   | 0.19       |
| Good                                         | 284            | 5.49       | 144            | 2.78       | 601                 | 22.49      | 131                 | 4.90       |
| Moderate                                     | 2633           | 50.85      | 1254           | 24.22      | 1689                | 63.21      | 1221                | 45.70      |
| Poor                                         | 2255           | 43.56      | 3771           | 72.84      | 354                 | 13.25      | 1305                | 48.84      |
| Bad                                          | 0              | 0          | 2              | 0.04       | 0                   | 0          | 10                  | 0.37       |
| Unit: Area(km <sup>2</sup> ), Percentage (%) |                |            |                |            |                     |            |                     |            |

**Table S3.** Result of intensity of urban expansion, EQI changes and USI of all cities in three urban agglomerations. (UEI, EQICI and USI mean the urban expansion intensity, EQI change intensity and urban synergistic index, respectively).

| UA   | City         | UEI         | EQICI        | USI          |
|------|--------------|-------------|--------------|--------------|
| BTH  | Tianjin      | 3.251443552 | -0.205437387 | -0.063183439 |
|      | Xingtai      | 2.525739949 | -0.042809255 | -0.016949194 |
|      | Langfang     | 1.725408852 | -0.199302496 | -0.115510301 |
|      | Beijing      | 1.562325939 | -0.121836333 | -0.07798394  |
|      | Hengshui     | 1.460029137 | -0.045026883 | -0.030839715 |
|      | Cangzhou     | 1.416683418 | -0.125667087 | -0.08870513  |
|      | Chengde      | 1.411562135 | -0.020617893 | -0.014606437 |
|      | Baoding      | 1.307709004 | -0.058315534 | -0.044593663 |
|      | Handan       | 1.252975876 | -0.068903748 | -0.054992079 |
|      | Zhangjiakou  | 1.181267074 | 0.130162256  | 0.110188677  |
|      | Shijiazhuang | 1.067140803 | -0.084816349 | -0.079479998 |
|      | Tangshan     | 0.937949067 | -0.22336048  | -0.238137109 |
|      | Qinhuangdao  | 0.930626391 | -0.167707997 | -0.180209801 |
| CYRD | Chizhou      | 6.166978252 | 0.021659765  | 0.003512217  |
|      | Jiaxing      | 5.892229016 | -0.148447789 | -0.025193825 |
|      | Chuzhou      | 5.101239063 | 0.087836026  | 0.017218567  |
|      | Yangzhou     | 4.525641928 | -0.047993326 | -0.010604756 |
|      | Hangzhou     | 4.327494139 | 0.009229276  | 0.002132707  |
|      | Suzhou       | 4.294467929 | -0.105721231 | -0.024618005 |
|      | Xuancheng    | 4.166617911 | -0.010236682 | -0.002456832 |
|      | Huzhou       | 4.073088007 | -0.079974708 | -0.019634908 |
|      | Zhenjiang    | 3.896968116 | -0.072289503 | -0.018550191 |
|      | Taizhou      | 3.816615667 | -0.124705437 | -0.03267435  |
|      | Wuxi         | 3.376759575 | -0.074652881 | -0.022107846 |
|      | Hefei        | 3.372140924 | 0.029534413  | 0.008758357  |
|      | Yancheng     | 3.353712259 | -0.023981225 | -0.007150651 |
|      | Taizhou      | 3.125321084 | 0.032018018  | 0.010244713  |
|      | Nanjing      | 2.635668198 | -0.083248368 | -0.031585299 |
|      | Wuhu         | 2.632732054 | -0.058238176 | -0.022120814 |
|      | Anqing       | 2.58136841  | -0.006232581 | -0.002414448 |
|      | Tongling     | 2.512313912 | -0.020135735 | -0.008014817 |
|      | Nantong      | 2.432616572 | -0.079581175 | -0.032714229 |
|      | Changzhou    | 2.332602391 | -0.101105671 | -0.04334458  |
|      | Zhoushan     | 2.234760278 | 0.197563748  | 0.088404895  |
|      | Shaoxing     | 2.17873141  | 0.01293737   | 0.005938029  |
|      | Jinhua       | 2.107636662 | 0.017263212  | 0.008190791  |
|      | Ningbo       | 2.012381833 | -0.012488163 | -0.006205663 |

|            |           |             |              |              |
|------------|-----------|-------------|--------------|--------------|
|            | Maanshan  | 1.855252431 | -0.044514508 | -0.023993774 |
|            | Shanghai  | 1.433636763 | -0.046163001 | -0.032199928 |
|            | Wenzhou   | 0.764265537 | 0.058861961  | 0.077017683  |
|            | Huizhou   | 4.777598719 | 0.003734096  | 0.000781584  |
|            | Zhongshan | 2.471422989 | -0.101423497 | -0.041038502 |
|            | Zhuhai    | 2.191544228 | -0.116607702 | -0.053208008 |
|            | Zhaoqing  | 2.082756579 | 0.10399357   | 0.049930736  |
| <b>PRD</b> | Jiangmen  | 1.934174056 | 0.030098958  | 0.01556166   |
|            | Guangzhou | 1.744496692 | -0.009704479 | -0.00556291  |
|            | Foshan    | 1.613826971 | -0.035162348 | -0.021788177 |
|            | Shenzhen  | 1.583951159 | 0.000968488  | 0.000611438  |
|            | Dongguan  | 1.572168318 | -0.093459263 | -0.059446092 |

**Table S4.** Total area and land occupation rate of  $\Delta$ EQI at various levels of urban agglomerations.

|                                   | <b>BTH</b>  |                   | <b>CYRD</b> |                   | <b>PRD</b>  |                   |
|-----------------------------------|-------------|-------------------|-------------|-------------------|-------------|-------------------|
| <b>EQI change</b>                 | <b>Area</b> | <b>Percentage</b> | <b>Area</b> | <b>Percentage</b> | <b>Area</b> | <b>Percentage</b> |
| <b>Obvious Improved (OI)</b>      | 1           | 0.00              | 155         | 0.07              | 2           | 0.00              |
| <b>Slightly Improved (SI)</b>     | 8333        | 3.89              | 4523        | 2.09              | 3224        | 6.25              |
| <b>Inapparent Change (IC)</b>     | 170177      | 79.41             | 160650      | 74.25             | 44121       | 85.50             |
| <b>Slightly Deteriorated (SD)</b> | 35106       | 16.38             | 49289       | 22.78             | 4209        | 8.15              |
| <b>Deteriorated (DR)</b>          | 697         | 0.32              | 1754        | 0.81              | 53          | 0.10              |

Unit: Area(km<sup>2</sup>), Percentage (%)

**Table S5.** Results of collinearity diagnosis of single urban agglomeration. The number in gray font means insignificant result.

|                        | <b>GDP</b> | <b>HD</b> | <b>LAI</b> | <b>Soil</b> | <b>Tmp</b> | <b>Pre</b> | <b>PM2.5</b> | <b>NDVI</b> | <b>GPP</b> | <b>LC</b> |
|------------------------|------------|-----------|------------|-------------|------------|------------|--------------|-------------|------------|-----------|
| <b>BTH</b>             | 1.572      | 1.321     | 6.272      | 1.127       | 2.041      | 3.418      | 5.073        | 3.118       | 6.306      | 2.238     |
| <b>VIF</b> <b>CYRD</b> | 2.068      | 1.329     | 7.575      | 1.204       | 1.874      | 1.720      | 3.376        | 6.221       | 5.339      | 2.514     |
| <b>PRD</b>             | 2.584      | 1.478     | 11.137     | 1.233       | 2.174      | 1.297      | 1.919        | 7.347       | 18.576     | 2.611     |

**Table S6.** Global Moran' I measurement results of EQI in three urban agglomerations.

| <b>UA</b> | <b>BTH</b>  |             | <b>CYRD</b> |             | <b>PRD</b>  |             |
|-----------|-------------|-------------|-------------|-------------|-------------|-------------|
|           | <b>2001</b> | <b>2020</b> | <b>2001</b> | <b>2020</b> | <b>2001</b> | <b>2020</b> |
| Moran' I  | 0.255632    | 0.291790    | 0.3088      | 0.1761      | 0.1985      | 0.1096      |
| Z value   | 103.2438    | 145.3005    | 108.0048    | 183.9107    | 39.2330     | 52.5915     |
| P value   | 0.0000      | 0.0000      | 0.0000      | 0.0000      | 0.0000      | 0.0000      |
